# Supplementary material for: Two-dimensional multiferroic RuClF/AgBiP2S6 van der Waals heterostructures with valley splitting properties and controllable magnetic anisotropy
Source: Royal Society of Chemistry journal article supplement (doi:10.1039/d4cp01059k), 2024-01-01
Supplement: d4cp01059k1.pdf [file d4cp01059k1.pdf]

*Electronic Supplementary Information for*

**Two-dimensional Multiferroic RuClF/AgBiP<sub>2</sub>S<sub>6</sub> van der Waals  
Heterostructure with Valley Splitting Properties and  
Controllable Magnetic Anisotropy**

Ziyu Liu,<sup>a</sup> Baozeng Zhou<sup>a</sup> and Xiaocha Wang<sup>a,\*</sup>

*<sup>a</sup>Tianjin Key Laboratory of Film Electronic & Communicate devices, School of  
Integrated Circuit Science and Engineering, Tianjin University of Technology,  
Tianjin 300384, China*

---

\*Author to whom all correspondence should be addressed.

E-mail: [wangxc@email.tjut.edu.cn](mailto:wangxc@email.tjut.edu.cn)

**Table S1.** The formation energies of RuClF and AgBiP<sub>2</sub>S<sub>6</sub> monolayers and the chemical potentials of each element.

|                                   | $\mu_{Ru}$ | $\mu_{Cl}$ | $\mu_F$ | $\mu_{Ag}$ | $\mu_{Bi}$ | $\mu_P$ | $\mu_S$ | $E_f$  |
|-----------------------------------|------------|------------|---------|------------|------------|---------|---------|--------|
| RuClF                             | -9.210     | -1.842     | -1.857  | /          | /          | /       | /       | -1.058 |
| AgBiP <sub>2</sub> S <sub>6</sub> | /          | /          | /       | -32.212    | -4.606     | -5.083  | -2.515  | -0.571 |

**Table S2.** The total energy (eV) of RuClF/ AgBiP<sub>2</sub>S<sub>6</sub> heterostructures with different magnetic configuration.

| Polarization | AFM-1      | AFM-2      | AFM-3      | FM         |
|--------------|------------|------------|------------|------------|
| P↑           | -94.570861 | -94.570573 | -94.570635 | -94.601326 |
| P↓           | -94.527509 | -94.527379 | -94.527423 | -94.557960 |

**Table S3.** Ferroelectric dipole moments, paraelectric dipole moments and polarization intensities of  $\text{AgBiP}_2\text{S}_6$  and  $\text{RuClF}/\text{AgBiP}_2\text{S}_6$  heterostructures.

|                                                            | $p_{zFE}$ | $p_{zPE}$ | $P_z(10^{-10}\text{C}/\text{m}^2)$ |
|------------------------------------------------------------|-----------|-----------|------------------------------------|
| $\text{AgBiP}_2\text{S}_6$                                 | -28.31796 | -28.78903 | 0.17994                            |
| $\text{RuClF}/\text{AgBiP}_2\text{S}_6\text{-P}\uparrow$   | -67.47134 | -39.35030 | 12.16129                           |
| $\text{RuClF}/\text{AgBiP}_2\text{S}_6\text{-P}\downarrow$ | -56.24972 | -87.37059 | -12.16122                          |

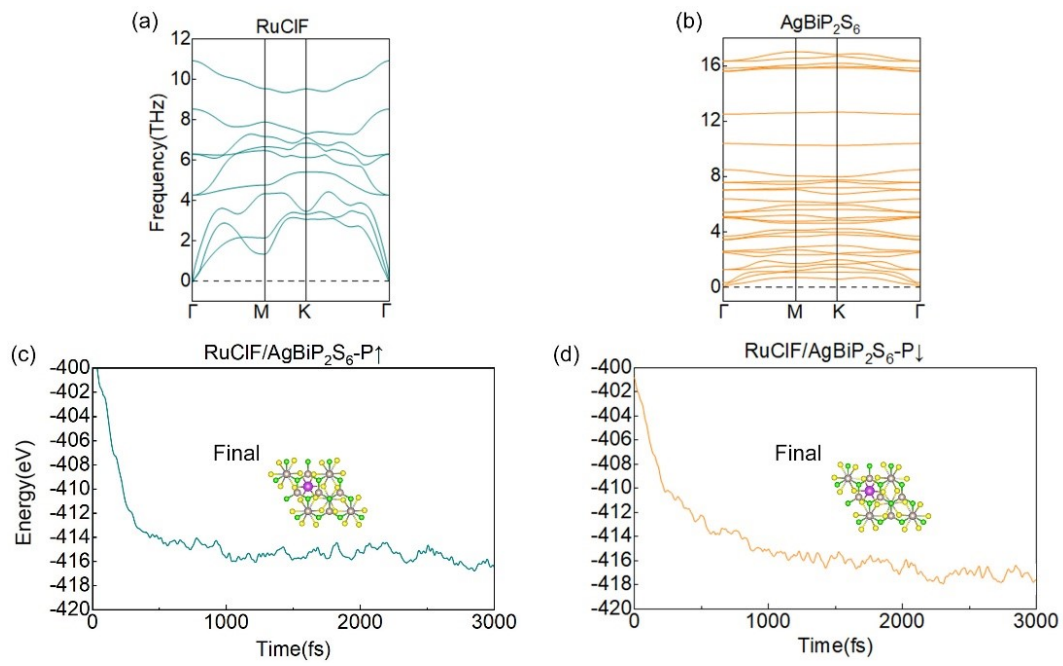

**Fig. S1** Phonon spectrum of (a) RuClF and (b) AgBiP<sub>2</sub>S<sub>6</sub> monolayers. (c)-(d) Simulation of potential energy fluctuations in RuClF/AgBiP<sub>2</sub>S<sub>6</sub> heterostructures in the different polarizations after 3ps.

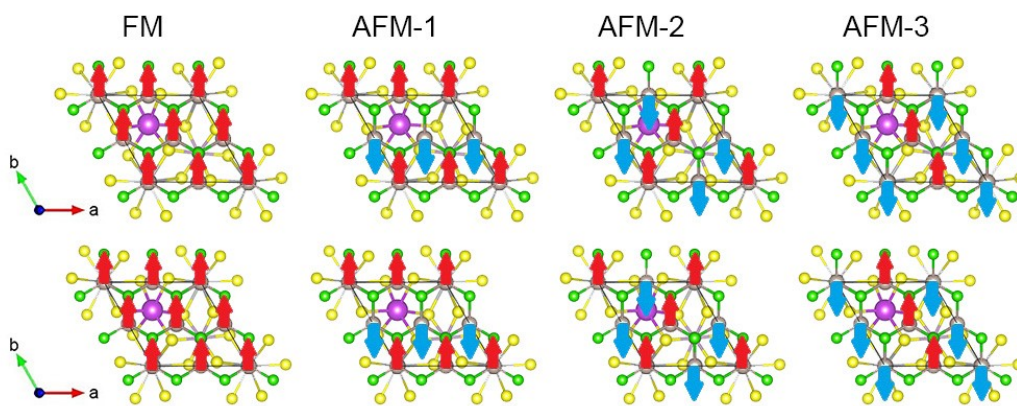

**Fig. S2** The structures of two kinds of RuClF/AgBiP<sub>2</sub>S<sub>6</sub> heterostructures in FM, AFM1, AFM2 and AFM3 states. Red and Blue arrows indicate different spin directions.

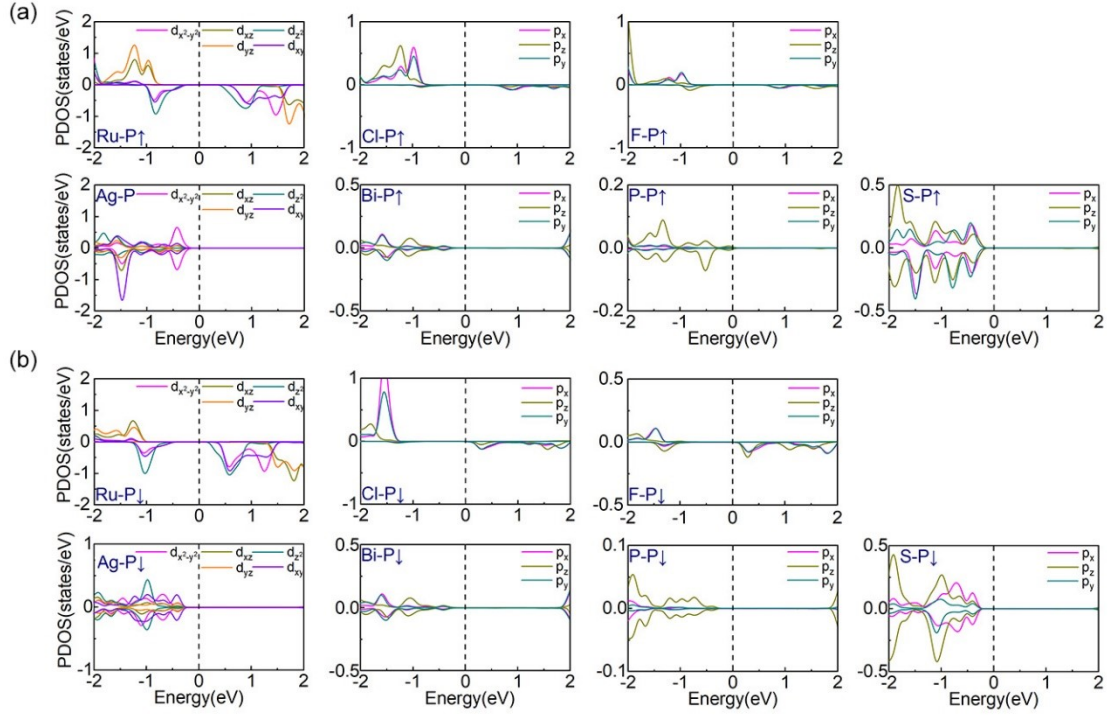

**Fig. S3** (a)-(b) DOS of each element of RuClF/AgBiP<sub>2</sub>S<sub>6</sub> heterostructures in different polarizations. The Fermi level is set as 0eV.

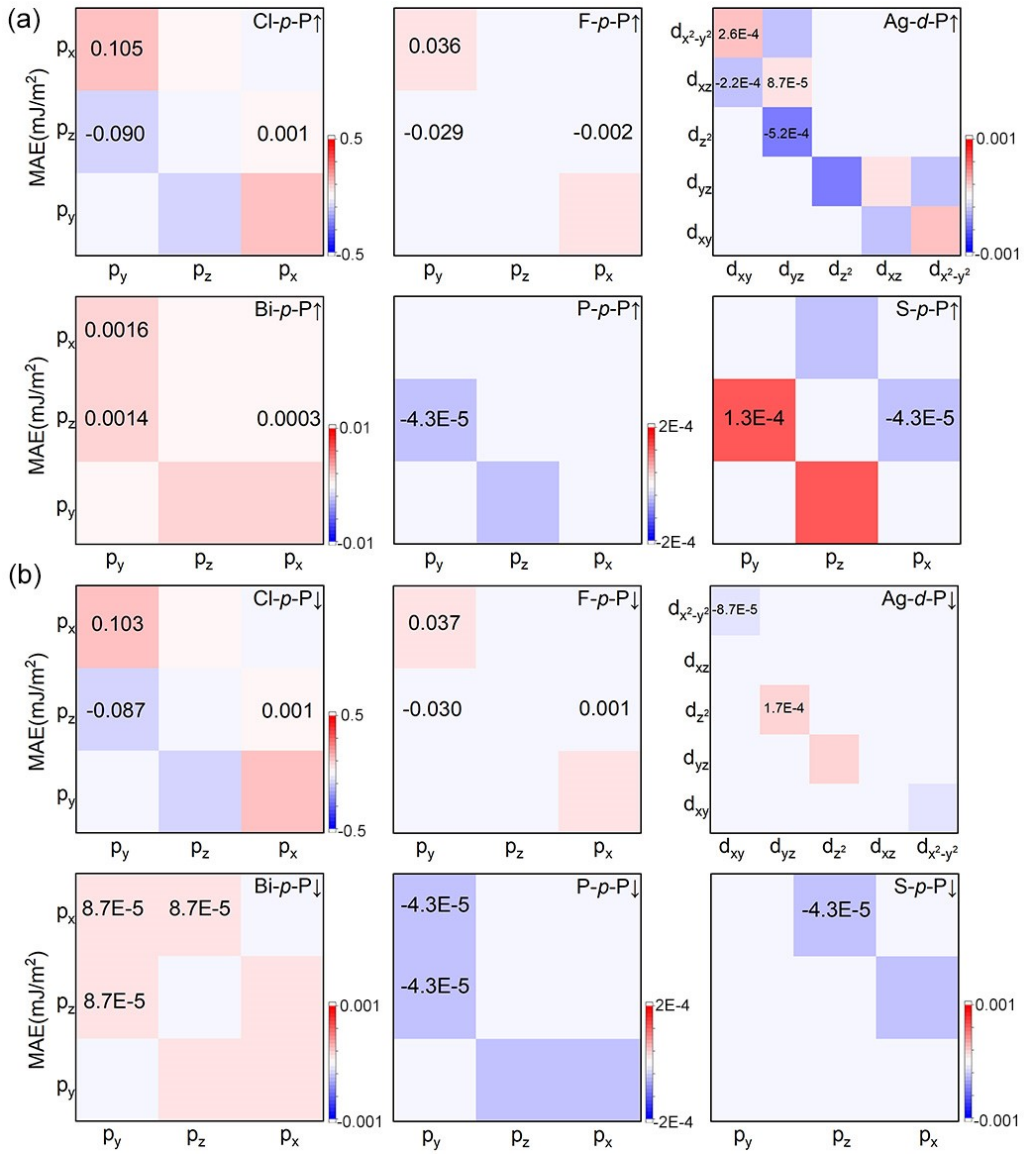

**Fig. S4** (a)-(b) Each element (except Ru)'s orbital resolved MAE of RuClF/AgBiP<sub>2</sub>S<sub>6</sub> heterostructures in different polarizations.



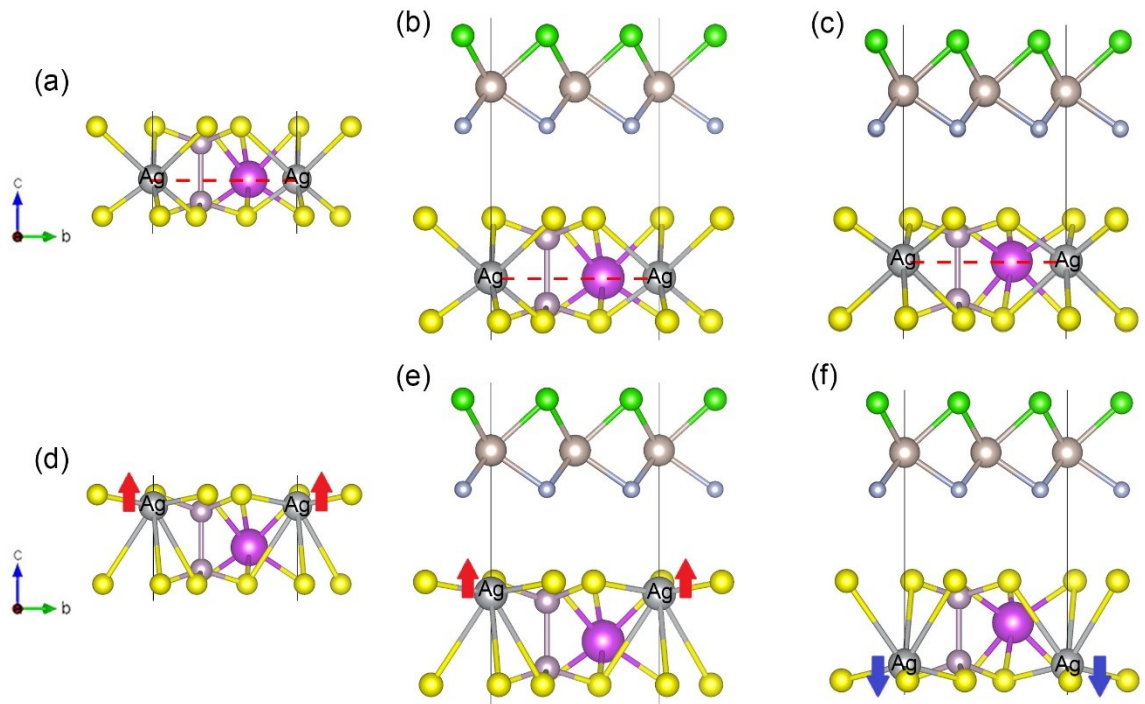

**Fig. S5** Paraelectric phase structures and ferroelectric phase structures of  $\text{AgBiP}_2\text{S}_6$  and  $\text{RuClF}/\text{AgBiP}_2\text{S}_6$  heterostructures.

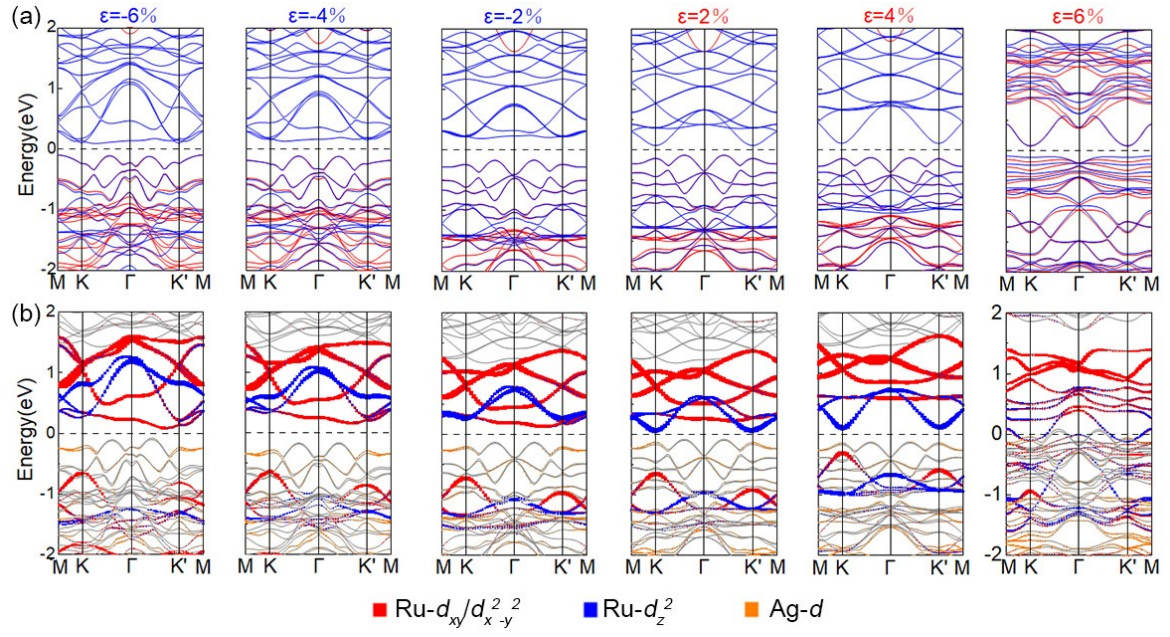

**Fig. S6** Band structures (a)without and (b)with SOC of RuClF/AgBiP<sub>2</sub>S<sub>6</sub>-P<sub>↓</sub> heterostructure at different biaxial strains.
